# Supplementary material for: Genotype–Phenotype Relationship among 785 Unrelated White Women with Inherited Congenital Factor VII Deficiency: A Three-Center Database Study
Source: MDPI journal article supplement (doi:10.3390/jcm13010049), 2023-12-21
Supplement: s1 [file s1]

## Supplementary tables

**Supplementary Table S1.** Total genetic sequence variations (n=354) found in this study (bold variants were not to be found in EAHAD F7-database or scientific literature; snv = single nucleotide variant [non-coding, non splice site])

| Sequence change          | Location          | Amino acid change   | Mutation           | N of alleles |
|--------------------------|-------------------|---------------------|--------------------|--------------|
| <b>c.-248C&gt;T</b>      | <b>Promoter</b>   |                     | <b>snv</b>         | <b>1</b>     |
| c.-89C>T                 | Promoter          |                     | snv                | 1            |
| c.-65G>C                 | Promoter          |                     | snv                | 2            |
| c.-55C>G                 | Promoter          |                     | snv                | 2            |
| c.-55C>T                 | Promoter          |                     | snv                | 5            |
| c.-44T>C                 | 1 (5'UTR)         |                     | snv                | 6            |
| c.-30A>C                 | 1 (5'UTR)         |                     | snv                | 4            |
| <b>c.-5_4delinsCA</b>    | <b>1 (5'UTR)</b>  |                     | <b>splice site</b> | <b>1</b>     |
| c.14C>A                  | 1                 | p.(Ala5Asp)         | missense           | 2            |
| c.56T>C                  | 1                 | p.(Leu19Pro)        | missense           | 1            |
| <b>c.58G&gt;A</b>        | <b>1</b>          | <b>p.(Ala20Thr)</b> | <b>missense</b>    | <b>1</b>     |
| c.64G>A                  | 1                 | p.(Gly22Ser)        | missense           | 4            |
| <b>c.64+2T&gt;C</b>      | <b>1 (Intron)</b> |                     | <b>splice site</b> | <b>1</b>     |
| <b>c.98G&gt;C</b>        | <b>2</b>          | <b>p.(Arg33Pro)</b> | <b>missense</b>    | <b>1</b>     |
| <b>c.156C&gt;G</b>       | <b>3</b>          | <b>p.(His52Gln)</b> | <b>missense</b>    | <b>1</b>     |
| <b>c.170G&gt;A</b>       | <b>3</b>          | <b>p.(Arg57Gln)</b> | <b>missense</b>    | <b>1</b>     |
| c.178C>G                 | 3                 | p.(Arg60Gly)        | missense           | 1            |
| c.208C>T                 | 3                 | p.(Pro70Ser)        | missense           | 1            |
| c.215C>G                 | 3                 | p.(Ser72Cys)        | missense           | 2            |
| c.218T>A                 | 3                 | p.(Leu73Gln)        | missense           | 2            |
| <b>c.218T&gt;C</b>       | <b>3</b>          | <b>p.(Leu73Pro)</b> | <b>missense</b>    | <b>1</b>     |
| c.220dupG                | 3                 | p.(Glu74Glyfs*33)   | frameshift         | 3            |
| c.235G>C                 | 3                 | p.(Glu79Gln)        | missense           | 2            |
| c.245G>T                 | 3                 | p.(Cys82Phe)        | missense           | 2            |
| c.247T>C                 | 3                 | p.(Ser83Pro)        | missense           | 1            |
| <b>c.256_257delinsTT</b> | <b>3</b>          | <b>p.Glu86Leu</b>   | <b>missense</b>    | <b>2</b>     |
| c.262C>G                 | 3                 | p.(Arg88Gly)        | missense           | 2            |
| <b>c.265G&gt;C</b>       | <b>3</b>          | <b>p.(Glu89Gln)</b> | <b>missense</b>    | <b>1</b>     |
| c.291+1G>C               | 3 (Intron)        |                     | snv                | 3            |
| <b>c.291+2T&gt;G</b>     | <b>3 (Intron)</b> |                     | <b>snv</b>         | <b>1</b>     |
| <b>c.291+5G&gt;T</b>     | <b>3 (Intron)</b> |                     | <b>snv</b>         | <b>1</b>     |
| <b>c.291+71A&gt;G</b>    | <b>3 (Intron)</b> |                     | <b>snv</b>         | <b>1</b>     |
| <b>c.292-26C&gt;G</b>    | <b>3 (Intron)</b> |                     | <b>snv</b>         | <b>2</b>     |
| c.317-1G>C               | 4 (Intron)        |                     | splice site        | 2            |

|                       |                   |                      |                    |          |
|-----------------------|-------------------|----------------------|--------------------|----------|
| c.430+1G>A            | 5 (Intron)        |                      | splice site        | 2        |
| <b>c.431-40C&gt;T</b> | <b>5 (Intron)</b> |                      | <b>snv</b>         | <b>1</b> |
| <b>c.431-7T&gt;G</b>  | <b>5 (Intron)</b> |                      | <b>splice site</b> | <b>1</b> |
| <b>c.430C&gt;G</b>    | <b>5</b>          | <b>p.(His144Asp)</b> | <b>missense</b>    | <b>1</b> |
| <b>c.430C&gt;T</b>    | <b>5</b>          | <b>p.(His144Tyr)</b> | <b>missense</b>    | <b>1</b> |
| c.460G>A              | 6                 | p.(Glu154Lys)        | missense           | 3        |
| c.466G>A              | 6                 | p.(Gly156Ser)        | missense           | 4        |
| c.469G>A              | 6                 | p.(Gly157Ser)        | missense           | 2        |
| <b>c.475G&gt;A</b>    | <b>6</b>          | <b>p.(Glu159Lys)</b> | <b>missense</b>    | <b>1</b> |
| c.479A>G              | 6                 | p.(Gln160Arg)        | missense           | 5        |
| c.571+78G>A           | 6 (Intron)        |                      | snv                | 2        |
| c.580C>A              | 7                 | p.(Pro194Thr)        | missense           | 1        |
| c.583T>C              | 7                 | p.(Cys195Arg)        | missense           | 2        |
| c.589A>G              | 7                 | p.(Lys197Glu)        | missense           | 4        |
| <b>c.632G&gt;A</b>    | <b>7</b>          | <b>p.(Gly211Asp)</b> | <b>missense</b>    | <b>1</b> |
| c.634C>T              | 7                 | p.(Arg212*)          | nonsense           | 2        |
| c.635G>A              | 7                 | p.(Arg212Gln)        | missense           | 2        |
| <b>c.646G&gt;C</b>    | <b>7</b>          | <b>p.(Gly216Arg)</b> | <b>missense</b>    | <b>1</b> |
| <b>c.664G&gt;C</b>    | <b>7</b>          | <b>p.(Gly222Arg)</b> | <b>missense</b>    | <b>2</b> |
| <b>c.682-9C&gt;T</b>  | <b>7 (Intron)</b> |                      | <b>splice site</b> | <b>1</b> |
| <b>c.691_693del</b>   | <b>8</b>          | <b>p.(Leu231del)</b> | <b>deletion</b>    | <b>1</b> |
| <b>c.718G&gt;T</b>    | <b>8</b>          | <b>p.(Gly240Trp)</b> | <b>missense</b>    | <b>1</b> |
| c.791T>C              | 8                 | p.(Leu264Pro)        | missense           | 1        |
| c.796G>A              | 8                 | p.(Ala266Thr)        | missense           | 1        |
| <b>c.797C&gt;T</b>    | <b>8</b>          | <b>p.(Ala266Val)</b> | <b>missense</b>    | <b>1</b> |
| c.805+3_805+6del      | 8 (Intron)        |                      | splice site        | 2        |
| c.805+7A>G            | 8 (Intron)        |                      | splice site        | 29       |
| <b>c.806-10T&gt;C</b> | <b>8 (Intron)</b> |                      | <b>snv</b>         | <b>1</b> |
| c.814G>A              | 9                 | p.(Asp272Asn)        | missense           | 2        |
| c.817_831del          | 9                 | p.(Leu273_Asp277del) | deletion           | 10       |
| c.829G>A              | 9                 | p.(Asp277Asn)        | missense           | 1        |
| c.847C>T              | 9                 | p.(Arg283Trp)        | missense           | 2        |
| c.851G>A              | 9                 | p.(Arg284Gln)        | missense           | 2        |
| <b>c.887C&gt;T</b>    | <b>9</b>          | <b>p.(Pro296Leu)</b> | <b>missense</b>    | <b>1</b> |
| c.910G>A              | 9                 | p.(Ala304Thr)        | missense           | 1        |
| c.911C>T              | 9                 | p.(Ala304Val)        | missense           | 13       |
| c.920G>A              | 9                 | p.(Arg307His)        | missense           | 1        |
| c.934G>A              | 9                 | p.(Val312Met)        | missense           | 9        |
| c.968T>C              | 9                 | p.(Leu323Pro)        | missense           | 2        |
| c.973G>A              | 9                 | p.(Glu325Lys)        | missense           | 3        |
| c.985T>C              | 9                 | p.(Ser329Pro)        | missense           | 1        |

|                     |          |                      |                   |          |
|---------------------|----------|----------------------|-------------------|----------|
| c.1009C>T           | 9        | p.(Arg337Cys)        | missense          | 2        |
| c.1027G>A           | 9        | p.(Gly343Ser)        | missense          | 2        |
| c.1061C>T           | 9        | p.(Ala354Val)        | missense          | 87       |
| c.1074G>A           | 9        | p.(Met358Ile)        | missense          | 2        |
| c.1088C>G           | 9        | p.(Pro363Arg)        | missense          | 18       |
| c.1090C>T           | 9        | p.(Arg364Trp)        | missense          | 2        |
| c.1091G>A           | 9        | p.(Arg364Gln)        | missense          | 4        |
| c.1151C>T           | 9        | p.(Thr384Met)        | missense          | 4        |
| c.1160T>C           | 9        | p.(Met387Thr)        | missense          | 2        |
| c.1163T>C           | 9        | p.(Phe388Ser)        | missense          | 1        |
| c.1171G>A           | 9        | p.(Gly391Ser)        | missense          | 9        |
| <b>c.1204G&gt;T</b> | <b>9</b> | <b>p.(Gly402Trp)</b> | <b>missense</b>   | <b>2</b> |
| c.1224T>G           | 9        | p.(His408Gln)        | missense          | 1        |
| <b>c.1245G&gt;A</b> | <b>9</b> | <b>p.(Thr415=)</b>   | <b>synonymous</b> | <b>1</b> |
| c.1256C>T           | 9        | p.(Thr419Met)        | missense          | 1        |
| c.1310A>T           | 9        | p.(Tyr437Phe)        | missense          | 3        |
| c.1384C>T           | 9        | p.(Arg462*)          | nonsense          | 2        |
| c.1391delC          | 9        | p.(Pro464Hisfs*32)   | frameshift        | 21       |
| c.1_1401del         | 1 - 9    | p.(Met1?)            | complete deletion | 2        |

**Supplementary Table S2.** Numbers and percentages of patients with additional thrombophilia

| Thrombophilia type                 |                                   |                                           |                                   | Number of patients | % of patients |                                       |
|------------------------------------|-----------------------------------|-------------------------------------------|-----------------------------------|--------------------|---------------|---------------------------------------|
| second                             | third                             | fourth                                    | fifth                             |                    | all 785       | all 189 with additional thrombophilia |
| F V Leiden only                    |                                   |                                           |                                   | 34                 | 4,33          | 17,99                                 |
| F V Leiden plus                    | Prothrombin G20210A mutation      |                                           |                                   | 1                  | 0,13          | 0,53                                  |
|                                    | Prothrombin A19911G mutation      |                                           |                                   | 2                  | 0,25          | 1,06                                  |
|                                    | Prothrombin A19911G mutation plus | MTHFR C677T Mutation                      |                                   |                    |               |                                       |
|                                    | Prothrombin A19911G mutation plus | MTHFR C677T mutation plus                 | Lipoprotein a metabolism disorder | 1                  | 0,13          | 0,53                                  |
|                                    | MTHFR C677T mutation plus         |                                           | PAI 4G/4G mutation                |                    |               |                                       |
| F V Leiden total                   |                                   |                                           |                                   | 41                 | 5,22          | 21,69                                 |
| Prothrombin G20210A mutation only  |                                   |                                           |                                   | 27                 | 3,44          | 14,29                                 |
| Prothrombin G20210A mutation plus  |                                   | Enhanced F VIII                           |                                   | 2                  | 0,25          | 1,06                                  |
|                                    |                                   | Lipoprotein a metabolism disorder         |                                   | 1                  | 0,13          | 0,53                                  |
|                                    |                                   | MTHFR C677T mutation plus                 | PAI 4G/4G mutation                |                    |               |                                       |
| Prothrombin G20210A mutation total |                                   |                                           |                                   | 32                 | 4,08          | 16,93                                 |
| Prothrombin A19911G only           |                                   |                                           |                                   | 17                 | 2,17          | 8,99                                  |
| Prothrombin A19911G plus           |                                   | Lipoprotein a metabolism disorder         |                                   | 1                  | 0,13          | 0,53                                  |
|                                    |                                   | Enhanced F VIII                           |                                   |                    |               |                                       |
|                                    |                                   | MTHFR C677T mutation                      |                                   |                    |               |                                       |
|                                    |                                   | MTHFR C677T mutation plus                 | PAI 4G/4G mutation                |                    |               |                                       |
| Prothrombin A19911G total          |                                   |                                           |                                   | 21                 | 2,68          | 11,11                                 |
| MTHFR C677T only                   |                                   |                                           |                                   | 20                 | 2,55          | 10,58                                 |
| MTHFR C677T plus                   |                                   | Lipoprotein a metabolism disorder         |                                   | 3                  | 0,38          | 1,59                                  |
|                                    |                                   | Protein S-, C- or antithrombin deficiency |                                   | 1                  | 0,13          | 0,53                                  |
| MTHFR C677T total                  |                                   |                                           |                                   | 24                 | 3,06          | 12,70                                 |

| Thrombophilia type                        |       |        |       | Number of patients | % of patients |                                       |
|-------------------------------------------|-------|--------|-------|--------------------|---------------|---------------------------------------|
| second                                    | third | fourth | fifth |                    | all 785       | all 189 with additional thrombophilia |
| PAI 4G/4G                                 |       |        |       | 6                  | 0,76          | 3,17                                  |
| Lipoprotein a metabolism disorder         |       |        |       | 28                 | 3,57          | 14,81                                 |
| Protein S-, C- or antithrombin deficiency |       |        |       | 19                 | 2,42          | 10,05                                 |
| Antiphospholipid syndrome                 |       |        |       | 2                  | 0,25          | 1,06                                  |
| Enhanced FVIII                            |       |        |       | 3                  | 0,38          | 1,59                                  |
